# Supplementary material for: Do Websites Provide What Applicants Need? Plastic Surgery Residency Program Websites Versus Applicant Self-reported Needs
Source: PubMed Central journal article supplement (PMC6250462; doi:10.1097/gox.0000000000001900), 2018-10-02
Supplement: gox-6-e1900-s001.pdf [file gox-6-e1900-s001.pdf]

**If you would like to be entered into a drawing for a \$50 Amazon gift card, please provide us with a valid email address where the prize can be sent.**

Please provide a valid email address

Type Email Address here

**1/ Which social media apps do you use in your personal and daily life? \***

Please select all social media apps that you use

- Facebook
- Twitter
- Instagram
- LinkedIn
- YouTube
- Google Plus
- Pinterest
- None

**2/ How often do you use social media apps? \***

please estimate how regularly you use social media apps

- Hourly
- Daily
- Weekly
- Every Two Weeks
- Monthly
- Annually

**3/ Do/did you use residency program websites when researching residency programs? \***

select one

- YES
- NO

THIS PAGE IS USING PREVIEW IMAGES FROM GETTY IMAGES. PLEASE PURCHASE THEM TO REMOVE THE WATERMARK.

please select all that apply

- No
- Brochures/print media
- Current/Previous Residents at the program of interest
- Current/Previous 4th year medical students at your home institution
- Medical School Advisors
- Another source: \_\_\_\_\_ (clarify below)

## What source?

## 5/ Would you follow a residency program's account on any of the following social media apps? \*

select all social media apps you would follow

- Facebook
- Twitter
- Instagram
- LinkedIn
- YouTube
- Google Plus
- Pinterest
- I don't plan on following a residency program's social media

## 6/ Which social media app would you consider most useful in learning about a residency program? \*

select one answer

- Facebook
- Twitter
- Instagram
- LinkedIn
- YouTube
- Google Plus
- Pinterest
- I don't believe social media is that useful to learning about a program

## 7/ When did you start browsing residency program

THIS PAGE IS USING PREVIEW IMAGES FROM GETTY IMAGES. PLEASE PURCHASE THEM TO REMOVE THE WATERMARK.

- Before medical school
- In selecting and considering specialties
- After deciding on a specialty but before the application process
- Only during the residency application process

## 8/ How useful was the information presented on residency program websites in your application process? \*

select the response that applies most to you

- very useful
- moderately useful
- slightly useful
- not useful

## 9/ Did the quality of a residency program website influence your decision to apply to that particular program? \*

select yes or no

- YES
- NO

## 10/ Did the quality of a residency program website influence your decision to interview at that particular program? \*

select yes or no

- YES
- NO

## 11/ When viewing a program's web site, the following is important: \*

Please select the option that applies most to you

### Programmatic Content

---

- Strongly Disagree       Disagree       Neutral       Agree       Strongly Agree

### Quality of Photographs

THIS PAGE IS USING PREVIEW IMAGES FROM GETTY IMAGES. PLEASE PURCHASE THEM TO REMOVE THE WATERMARK.

## Presence of Video Content

Strongly Disagree
  Disagree
  Neutral
  Agree
  Strongly Agree

## Consistent Page Layout

Strongly Disagree
  Disagree
  Neutral
  Agree
  Strongly Agree

## Aesthetic quality

Strongly Disagree
  Disagree
  Neutral
  Agree
  Strongly Agree

## Ease of Navigation

Strongly Disagree
  Disagree
  Neutral
  Agree
  Strongly Agree

## 12/ When viewing a program's website, which information do you find most important \*

please select all content entities that you find important

- Alumni testimonials and contact information
- Average resident work hours
- Board pass rates
- Career/Fellowship placement
- City/location information
- Current resident information
- Detailed application and interview information
- Faculty profiles
- FREIDA-like information
- Frequently asked questions and answers
- History of the program
- Hospital size and patient demographics

THIS PAGE IS USING PREVIEW IMAGES FROM GETTY IMAGES. PLEASE PURCHASE THEM TO REMOVE THE WATERMARK.

- Program goals and philosophy
- Residency curriculum
- Residency electives
- Resident finances/debt management
- Resident research
- Resident social lives
- Unique program features
- Work Schedules
- 

### 13/ Was there any information not found on residency program websites that you would like to see? \*

Please type your response, or No if nothing to add

Type Response Here

### 14/ Was there a discrepancy between any residency program’s website and your actual interview experience/encounter with the respective program? \*

please select yes or no

- YES
- NO

### 15/ What if any was your favorite or most memorable residency program website? \*

please provide us with the program's name, or None for no response

Type Response Here

**SUBMIT RESPONSES**

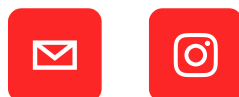

THIS PAGE IS USING PREVIEW IMAGES FROM GETTY IMAGES. PLEASE PURCHASE THEM TO REMOVE THE WATERMARK.
